# Supplementary material for: Validation of DAB2IP methylation and its relative significance in predicting outcome in renal cell carcinoma
Source: PubMed Central journal article supplement (PMC5058774; doi:10.18632/oncotarget.8971), 2016-04-25
Supplement: oncotarget-07-31508-s001.pdf [file oncotarget-07-31508-s001.pdf]

## Validation of DAB2IP methylation and its relative significance in predicting outcome in renal cell carcinoma

### SUPPLEMENTARY FIGURES AND TABLE

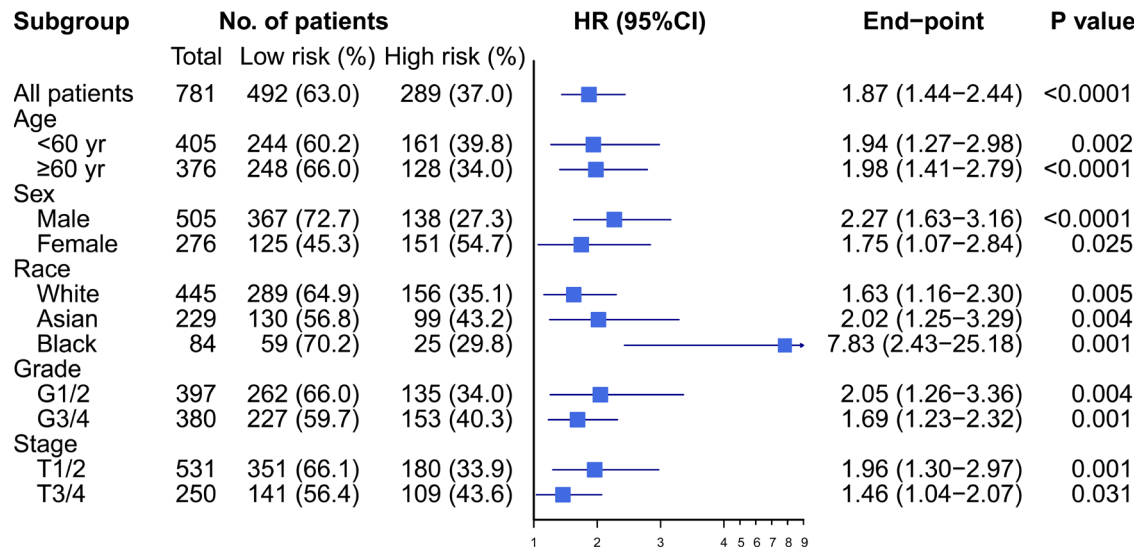

Supplementary Figure S1: Hazard ratio of overall mortality for all 781 patients with ccRCC according to the methylation of the DAB2IP CpG1 in different subgroups stratified by clinical parameters.

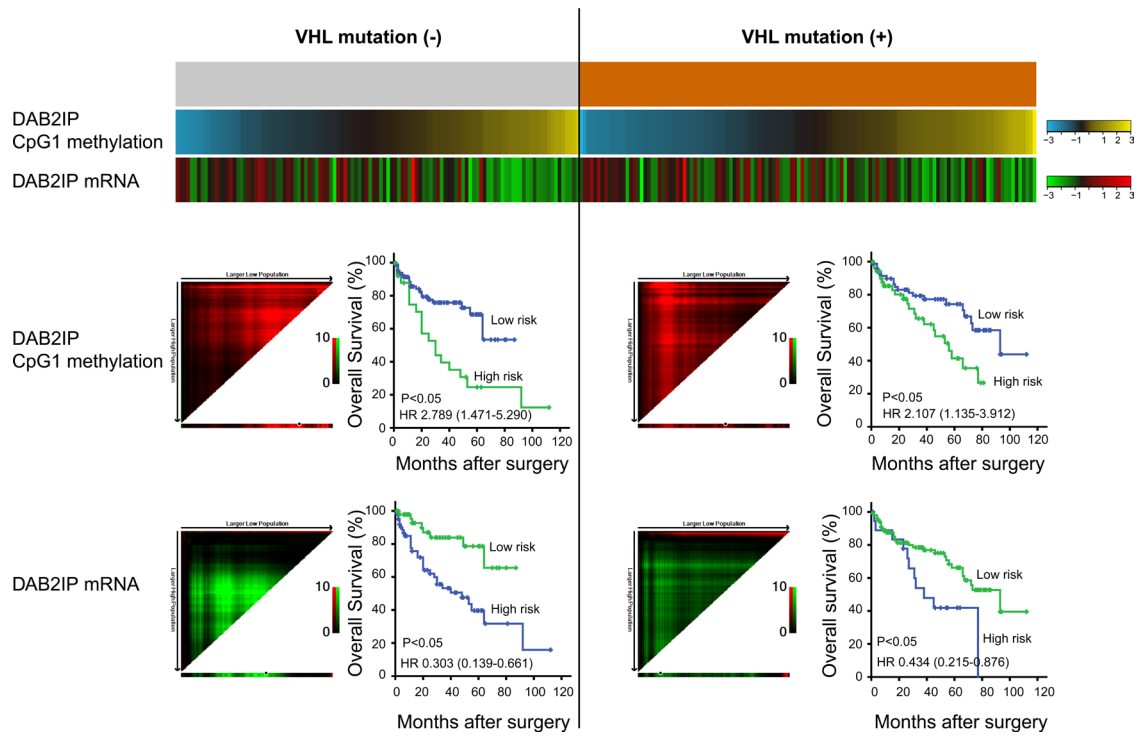

**Supplementary Figure S2: DAB2IP CpG1 methylation and DAB2IP mRNA in subsets of different VHL mutation status.** Based on the TCGA dataset analysis, DAB2IP CpG1 methylation and DAB2IP mRNA successfully predicted the prognosis of ccRCC in both VHL mutation (+) subtype and VHL mutation (-) subtype (all  $p < 0.05$ ). Patients in each subset were separated into high-risk and low-risk groups using X-tile plots to generate the optimum cut-off.

**Supplementary Table S1: 3 Probes located in UTSS of DAB2IP by the annotations provided by Illumina for the HumanMethylation450 platform**

| <b>ID</b>  | <b>CHR</b> | <b>MAPINFO</b> | <b>UCSC_RefGene_Name</b> | <b>UCSC_RefGene_Group</b> |
|------------|------------|----------------|--------------------------|---------------------------|
| cg01305539 | 9          | 124328327      | DAB2IP                   | TSS1500                   |
| cg14122599 | 9          | 124503625      | DAB2IP                   | TSS1500                   |
| cg14383549 | 9          | 124503795      | DAB2IP                   | TSS1500                   |
